# Supplementary material for: Structural and Biochemical Characterization of Mycobacterium tuberculosis Zinc SufU-SufS Complex
Source: MDPI journal article supplement (doi:10.3390/biom13050732), 2023-04-24
Supplement: s1 [file s1]

## **SUPPLEMENTARY MATERIALS**

## Supplementary Methods

### *SufS and SufU interaction*

6xHis-SufU was incubated for 10 min. with SufS (in stoichiometric amount) and nickel nitrilotriacetic acid (Ni-NTA) resin with and without 5 mM L-cysteine. The mix was then loaded on a column and was left to flow by gravity without any pressure applied. The column was then washed with one column volume of buffer J. Bound proteins containing 6xHis-SufU and the 6xHis-SufU/SufS complex were eluted with buffer J containing 250 mM imidazole. The flow-through and the eluted proteins were analyzed by SDS-PAGE. Based on the SDS-PAGE profile, the concentration of 6xHis-SufU in the flow-through was assumed to be neglected so the protein content in the flow-through was assumed to be the amount of SufS that does not carry a 6xHis-tag and that didn't interact with 6xHis-SufU. The amount of SufS that interacted with SufU was quantified by simple deduction of the amount of SufS quantified in the flow-through from the initial amount of SufS that was used in the experiment.

### Supplementary Results

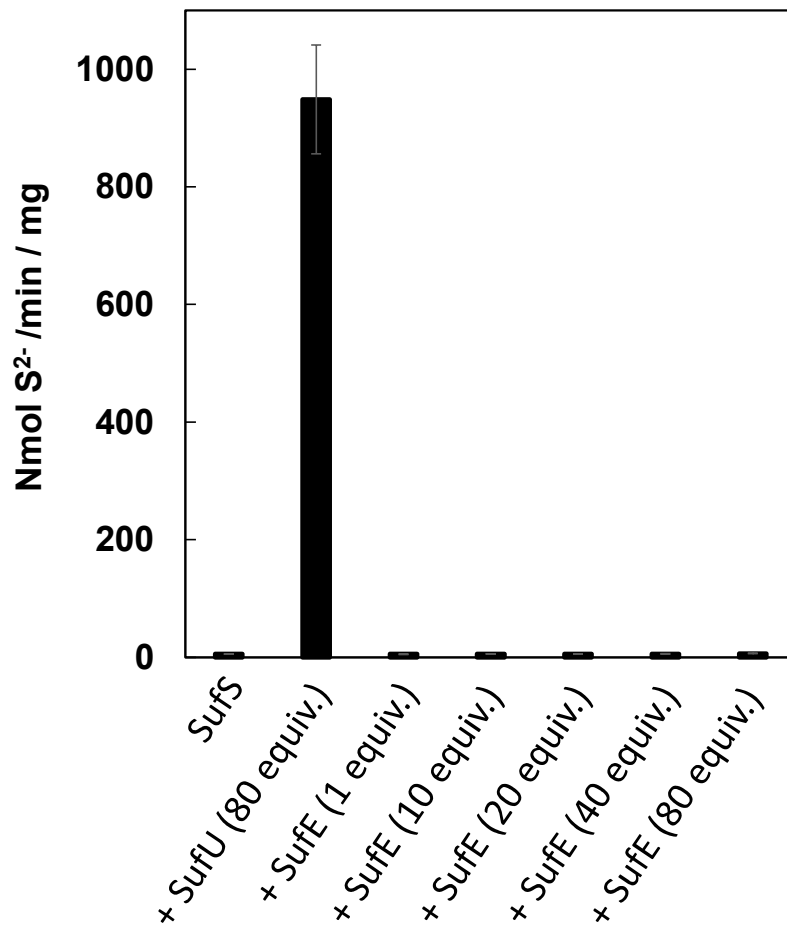

**Figure S1.** Specific activity of *Mtb* SufS (10  $\mu$ M) in the absence and in the presence of different equivalents of *E. coli* SufE (1-80 equivalents) or *Mtb* SufU (80 equivalents). Cysteine at 500  $\mu$ M was used in the assay.

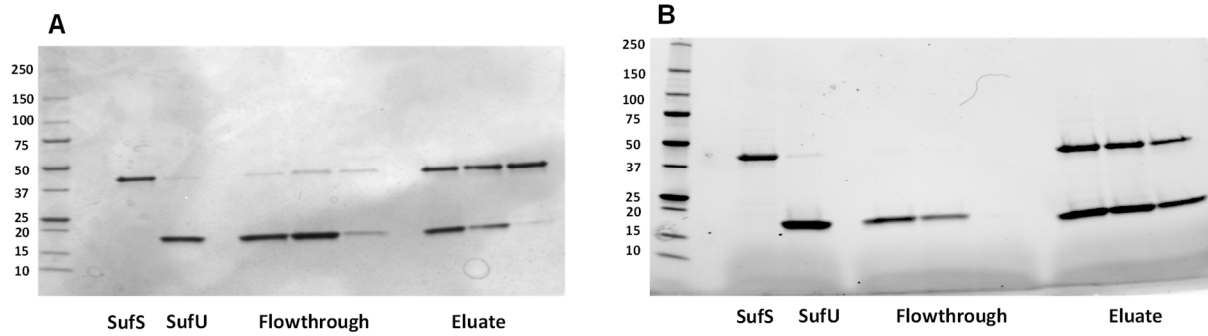

**Figure S2. (A) SufS-SufU interaction in solution. (A)** SDS-PAGE profile of 6xHis-SufS and SufU interaction in the absence of L-cysteine on affinity column (Ni-NTA). Lane (1) : known size markers (kDa), lane (2) : purified 6xHis-SufS, lane (3): purified SufU, lanes (4-6) flowthrough (FT) samples containing fractions of SufU which doesn't interact with SufS, lanes (7-9): eluate samples containing 6xHis-SufS and SufU. Protein quantification: FT: 63.8% of total SufU; Eluate: 36.2% of SufU. **(B)** SDS-PAGE profile of 6xHis-SufS and SufU interaction in the presence of 5mM L-cysteine on affinity column (Ni-NTA). Lane (1) : known size markers (kDa), lane (2) : purified 6xHis-SufS, lane (3): purified SufU, lanes (4-6) flowthrough (FT) samples containing fractions of SufU which doesn't interact with SufS, lanes (7-9): eluate samples containing 6xHis-SufS and SufU. Protein quantification: FT: 22% of total SufU; Eluate: 78% of SufU. From the quantitation, it seems that the interaction is increased in the presence of L-cysteine.

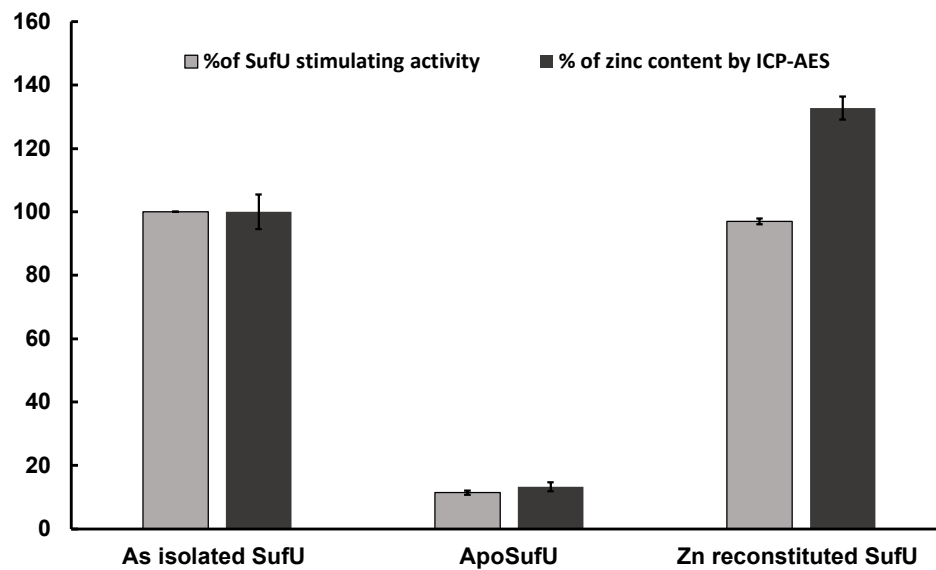

**Figure S3. Reconstitution of apo-SufU with zinc.** The SufU stimulating activity (%) was determined by measuring the specific activity of SufS (10  $\mu$ M) in presence of as-isolated SufU (10  $\mu$ M), apo-SufU (10  $\mu$ M) and Zn reconstituted SufU (10  $\mu$ M). The sulfurtransferase activity with the as-isolated SufU (60 nmoles  $S^2$ /min/mg) was considered as 100%. Apo-SufU displays an activity of 11.4% (6.4 nmoles  $S^2$ /min/mg), while SufU reconstituted with zinc was able to restore 96% (57.7 nmoles  $S^2$ /min/mg) of the as-isolated SufU sulfurtransferase activity. The zinc content was quantified by ICP-AES. The 100% content corresponds to 1.1 Zn/ monomer of the as-isolated SufU. The zinc content in apo-SufU is 13.2% (0.145 Zn/ monomer) and in case of the Zn reconstituted SufU, the zinc content is 132% (1.46 Zn/monomer) reflecting some unspecific zinc.

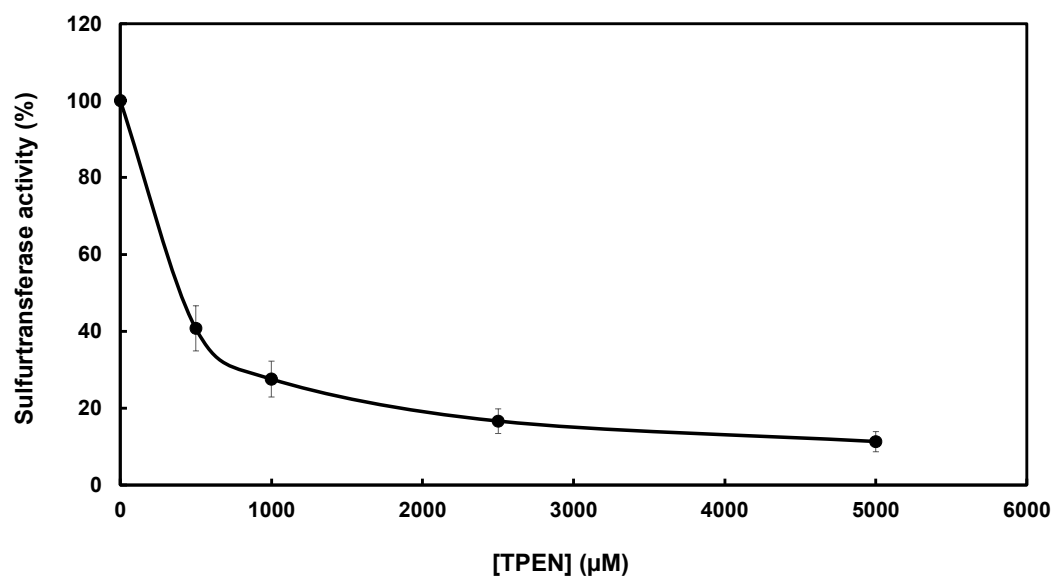

**Figure S4.** Sulfurtransferase activity of SufU (%). SufU (146 μM) was incubated with increasing concentrations of TPEN (0-5 mM) for 3 h followed by dialysis. The sulfur transfer activity of SufU was then determined by measuring the specific activity of SufS (10 μM) in the presence of each sample (10 μM), L-cysteine (500 μM), DTT (2 mM) for 30 min at 37°C. 100% corresponds to 78 nmoles of  $S^2$ /min/mg of SufS. The curve is superposable to that in Figure 5 showing that the loss of SufU sulfurtransferase activity is due to the gradual decrease in zinc content by increasing TPEN concentration.

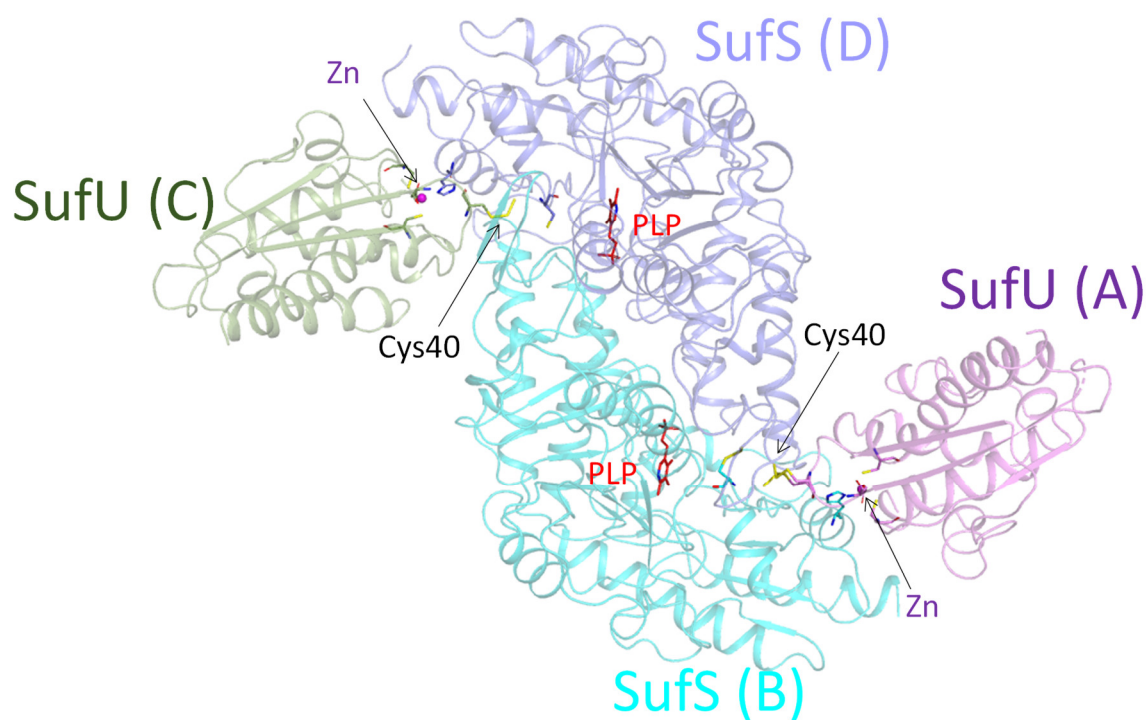

**Figure S5.** Overall crystal structure of *Mtb* SufS-SufU complex. The complex is represented in cartoon representation. The figure shows the arrangement of the different subunits, which consists as a dimer of complexes SufS-SufU (SufU in green and violet, SufS in cyan and blue). The PLP cofactor is represented in red inside SufS, and the zinc ions in purple at the interface SufS-SufU with their environment drawn in stick representation.

|                 |                                                                       |     |
|-----------------|-----------------------------------------------------------------------|-----|
| CsdA_Ecoli      | -----MNVFNPAQFRAQFPALQD-----AGVYLDASAATALKPEAVVEATQQFYSL--A           | 47  |
| Rv1464_Mtub     | -MTASVNSLDLAAIRADFPILKRI MRGNPLAYLDSGATSQRPLQVLDAREFLTAS--N           | 57  |
| SufS_Saureus    | MNEVAEHSFDVNEVIKDFPILDQKVN-GKRLAYLDSTATSQTPVQVLNVLEDYKKRY--N          | 57  |
| SufS_Bsubtilis  | -----MNITDIREQFPILHQQVN-GHDLVYLDASAATSKPRAVIETLDKYYNQY--N             | 49  |
| SufS_Efaecalis* | -----MMDAATIRQSFPILFQEVN-DEPLVYLDNAATTQKTAVLDVLRHHYEED--N             | 50  |
| SufS_Ecoli      | -----MIFSVDKVRADFVPLSRREV-NGLPLAYLDSASAQKPSQVIDAEAEFYRHG--Y           | 51  |
| SufS_MXAN       | -----MSGFDVNQVRKDFPILDQEVN-GRPLVYLDASAATQKPQVAIDALVRFYQHD--N          | 52  |
|                 | *** *:: * :                                                           |     |
| IscS_Ecoli      | GNPASRSHRFQWQAEAEVDIARNQIADLVGA-DPREIVFTSGATESDNLAIKGAANF---          | 89  |
| CsdA_Ecoli      | GNVHRSQFAEAQRILTARYEAAREKVAQLLNAPDDKTIVWTRGTESINMVAQCYARP---          | 104 |
| Rv1464_Mtub     | GAVHRGAHQLMEEATDAYEQGRADIALFVGA-DTDELVFTKNATEALNLVSYVLGDSRFE          | 116 |
| SufS_Saureus    | SNVHRGVHTLGLSLATDGYENARETVRRFINAKYFEEIIFTRGTASINLVAHSYGDA---          | 114 |
| SufS_Bsubtilis  | SNVHRGVHTLGLTRATDGYEGAREKVRKF INAKSMAEII FTKGTTSLNMVALSYARA---        | 106 |
| SufS_Efaecalis* | ANVHRGVHTLAERATKDYEASREKVRQFIHAKETAEVLFTTRGTTSLNWIAKSYGDL---          | 107 |
| SufS_Ecoli      | AAVHRGIHTLSAQATEKMENVRKRASLF INARSAAELVVFVRGTTEGINLVANSWGS---         | 108 |
| SufS_MXAN       | ANVHRGVHVLSEERATEAYEGARETVRRFINARDVKEVVFVRGTTEAINLVAQTYGRK---         | 109 |
|                 | . . : *                                                               |     |
| IscS_Ecoli      | -YQKKGKHIIITSKTEHKAVLDTCRQL-EREGFEVTYLAPQRNGIIDLKELEAAMRDDTIL         | 147 |
| CsdA_Ecoli      | -RLQPGDEIIVSVAEHHANLVPWLMVAQQTGAKVVKLPLNAQRLPDVDDLPELITPRSR           | 163 |
| Rv1464_Mtub     | RAVGPGDVIIVTTELEHHANLIPWQELARRTGATLRWYGVTDGRI DLDLSL--YLDNRVY         | 174 |
| SufS_Saureus    | -NVEEGDEIVVTEMEHHANIVPWQQLAKRKNATLKFIPMTADGELNIEDIKQITINDKTKI         | 173 |
| SufS_Bsubtilis  | -NLKPGDEVVITYMEHHANII PWQQAVKATGATLKYIPLQEDGTISLEDVRETVTNTTKI         | 165 |
| SufS_Efaecalis* | -AVTAGDEIVISYMEHHSNII PWQQLAQRGTGAILKYIDVTEDGFLDMASARQQITEKTKI        | 166 |
| SufS_Ecoli      | -NVRAGDNIIISQMEHHANIVPWQMLCARVGAELRVIPLPDGTQLQETLPTLFDEKTRL           | 167 |
| SufS_MXAN       | -HIGAGDEVLTQMEHHANIVPWRLMCEQTGAVLKVIPVDDRGLVLDVALLTERTRI              | 168 |
|                 | *. : : **:: :                                                         |     |
| IscS_Ecoli      | VSIMHVNNEIGVVQDIAAIGEMCRARGIIYHVDATQSVGKLPIDLSQLKVDLMSFSGHKI          | 207 |
| CsdA_Ecoli      | LALGQMSNVTGGCPDLARAITFAHSAGMVVMVDGAQAVHFPADVQQLDIDFYAFSGHKL           | 223 |
| Rv1464_Mtub     | VAFTHHSNVTGVLTPVSELVSRAHQSGALTVLDACQSVPHQPVDLHELGVDFAAFSGHKM          | 234 |
| SufS_Saureus    | VAAIAHISNVLGTINDVKTIAEIAHQHGAIISVDGAQAAPHMKLDMQEMNADFYFSFGHKM         | 233 |
| SufS_Bsubtilis  | VAVSHVSNVLGTVPNIKEMAKIAHDNGAVIVVDGAQSTPHMKIDVQDLDCDFALSSHKM           | 225 |
| SufS_Efaecalis* | VSIAHVSNNVLGVINPIEELTQLAHQNGAVMVVDGAQAVPHMPVDVQADADFYAFSGHKM          | 226 |
| SufS_Ecoli      | LAI THVSNVLGTENPLAEMITLAHQHGAKVLVDGAQAVMHHPVDVQALDCDFYVFSGHKL         | 227 |
| SufS_MXAN       | LAVTHVSNALGTVAPVKELTRRAHAKGIPVLVDGAQAVTHFPVDVQDLGCDFYAFSGHKM          | 228 |
|                 | ::. : .* * :                                                          |     |
| IscS_Ecoli      | YGPKGIGALYVRRKPRVRIEAQM HGGGHER-----GMRSGTLPVHQIVGM                   | 252 |
| CsdA_Ecoli      | YGPTGIGVLYGKSELLEAMS PWLGGMVHEVSF-DGFTTQSAPWKLEAGTPNVAQVIGL           | 282 |
| Rv1464_Mtub     | LGPNGIGVLYGRRELLAQMP PFLTGGSMIETVTM-EGATYAPAPQREAGTPMTSQVVGL          | 293 |
| SufS_Saureus    | LGPTGIGVLFGRKRELLQKMEPIEFGGDMIDFVSK-YDATWADLPTKFEAGTPLIAQAIGL         | 292 |
| SufS_Bsubtilis  | CGPTGVGVLYGKKALLENMEPAEFGGEMIDFVGL-YESTWKELPWKFEAGTPIIAGAIGL          | 284 |
| SufS_Efaecalis* | CGPTGIGVLYGKRHLLEQMEPVEFGGEMIDFVHL-QESTWKELPWKFEAGTPNIAGAIAL          | 285 |
| SufS_Ecoli      | YGPTGIGVLYVKEALLQEMPWEFGGSMIATVSLSEGTWTWKAPWFEAGTPNTGGIIGL            | 287 |
| SufS_MXAN       | FGPTGIGVLYGRKERLDAMPYQGGGDMILSVTM-EKVYTNRPYPYRFEAGTPNLEGAVGL          | 287 |
|                 | **.*:* : : :                                                          |     |
| IscS_Ecoli      | GEAYRIAKEEMATEME-RLRGLRNRLWNGIKDIEEVYLNGLD---EHGAPNINLVSNFYV          | 308 |
| CsdA_Ecoli      | SAALEWLADYDINQAESWSRSLATLAEDALAKRPGFRSFRCC---DSSLLAFDFAGVHH           | 338 |
| Rv1464_Mtub     | AAAARYLGAIGMAAVEAHERELVAAAIEGLSGIDGVRILGPTSMRDRGSPVAFVVEGVHA          | 353 |
| SufS_Saureus    | AEAIRYLERIGFDAIHKYEQELTIYAYEQMSAIEGIEIYGP PKD-RRAGVITFNLQDVHP         | 351 |
| SufS_Bsubtilis  | GAAIDFLEEIGLDEISRHEHKLAAVALERFRQLDGVTVYGP---ERAGLVTFNLDDVHP           | 341 |
| SufS_Efaecalis* | GAAIDYLTIEIGLEAIIHQHEAALVHYVLPKLQAIIEGLTIYGPQNP KDHTGVIAFNIEGLHP      | 345 |
| SufS_Ecoli      | GAALEYVSALGLNNIAEYEQNLMHYALSQLESVPDLTLYGPQ---NRLGVIAFNLGKHHHA         | 344 |
| SufS_MXAN       | AAAI RYLEALGMENVAADHRELLAYATQALESVPGLRMVGTAR---EKSGVLSFMLADIHP        | 345 |
|                 | . * :                                                                 |     |
| IscS_Ecoli      | EGESLIMALKDLAVSSGSACTSASLEPSYVLRALGLNDELAHSSIRFSLGRFTTEEEIDY          | 368 |
| CsdA_Ecoli      | SDMVTLLAEY GIALRAGQHCAQPLLA-----ELGV-----TGTLRASFAFYNTKSDVDA          | 387 |
| Rv1464_Mtub     | <b>H</b> DVGQVLD DGGVAVRVGHHCAQLPLHR-----RFLG-----AATARASFAVYNTADEVDR | 402 |
| SufS_Saureus    | <b>H</b> DVATAVDTEGVAVRAGHHCAQLPMK-----WLVN-----SSTARASFYIYNTKEDVDQ   | 400 |
| SufS_Bsubtilis  | <b>H</b> DVATVLDAEGIAVRAGHHCAQLPMK-----WLDV-----TATARASFYLYNTEEEIDK   | 390 |
| SufS_Efaecalis* | <b>H</b> DVATALDMEGVAVRAGHHCAQLPLN-----YLSV-----PATARASFYLYNTKEDADR   | 394 |
| SufS_Ecoli      | YDVGSFLDNYGIAVRTGHHCAPLMA-----YYNV-----PAMCRASLAMYNTHEEVDR            | 393 |
| SufS_MXAN       | <b>H</b> DVGTILDREGICIRTGHHCAQPMQ-----HFKV-----PATSRASLALYNTREDVDA    | 394 |
|                 | . : :. : * * :                                                        |     |
| IscS_Ecoli      | TIELVRK SIGRLRDLSPLEWEMYKQGVDLNSIEWAHH 404                            |     |
| CsdA_Ecoli      | LVNAVDRAL ELLVD-----401                                               |     |
| Rv1464_Mtub     | LVAGVRRSRHFFGRA-----417                                               |     |
| SufS_Saureus    | LINALKQTKEFFSYEF-----416                                              |     |
| SufS_Bsubtilis  | LVEALQKTKEYFTNVF-----406                                              |     |
| SufS_Efaecalis* | LVEAIKATKEFFQHGT-----411                                              |     |
| SufS_Ecoli      | LVTGLQRIHRLLG-----406                                                 |     |
| SufS_MXAN       | LVRGLHKVLEVFQ-----407                                                 |     |

**Figure S6.** Sequence alignment of type I and type II cysteine desulfurases. Type I (*E. coli* IscS) and type II (*E. coli* CsdA, *E. coli* SufS, *S. aureus* SufS, *B. subtilis* SufS, *E. faecalis* SufS, *Myxococcus xanthus* (MXAN) SufS and *Mtb* SufS). Highlight yellow : conserved histidine residue in type II cysteine desulfurases SufS functioning with SufU as sulfurtransferase.



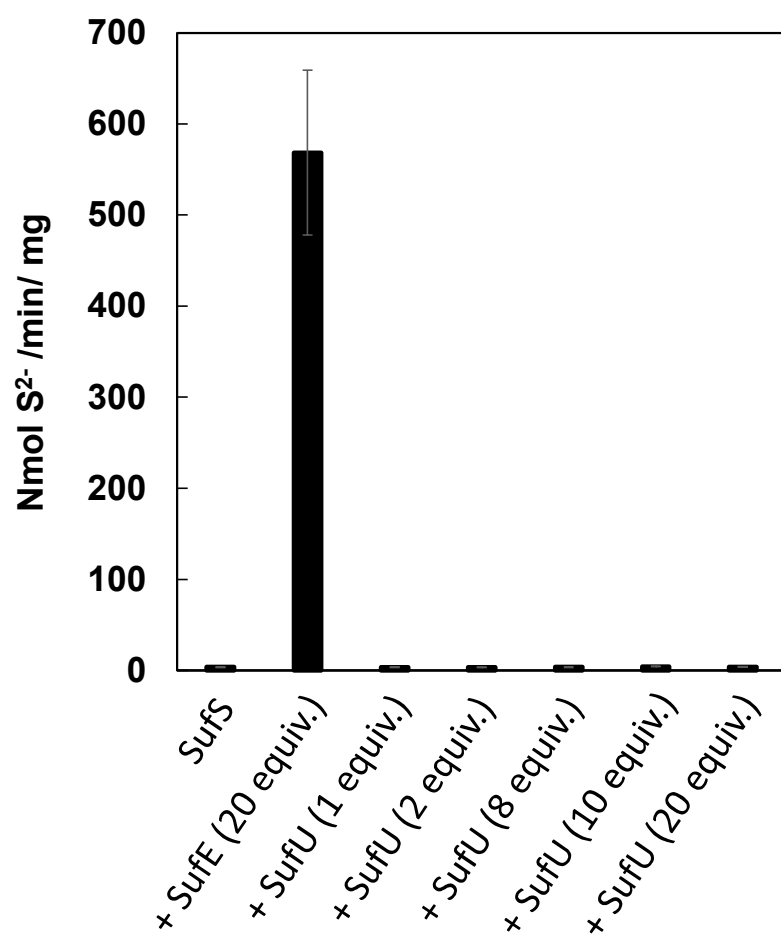

**Figure S7.** Specific activity of *E. coli* SufS (10  $\mu$ M) in the absence and in the presence of different equivalents of *E. coli* SufE (20 equivalents) and *Mtb* SufU (1-20 equivalents) for 30 min. at 37°C in presence of L-cystéine (500  $\mu$ M) and DTT (1 mM).

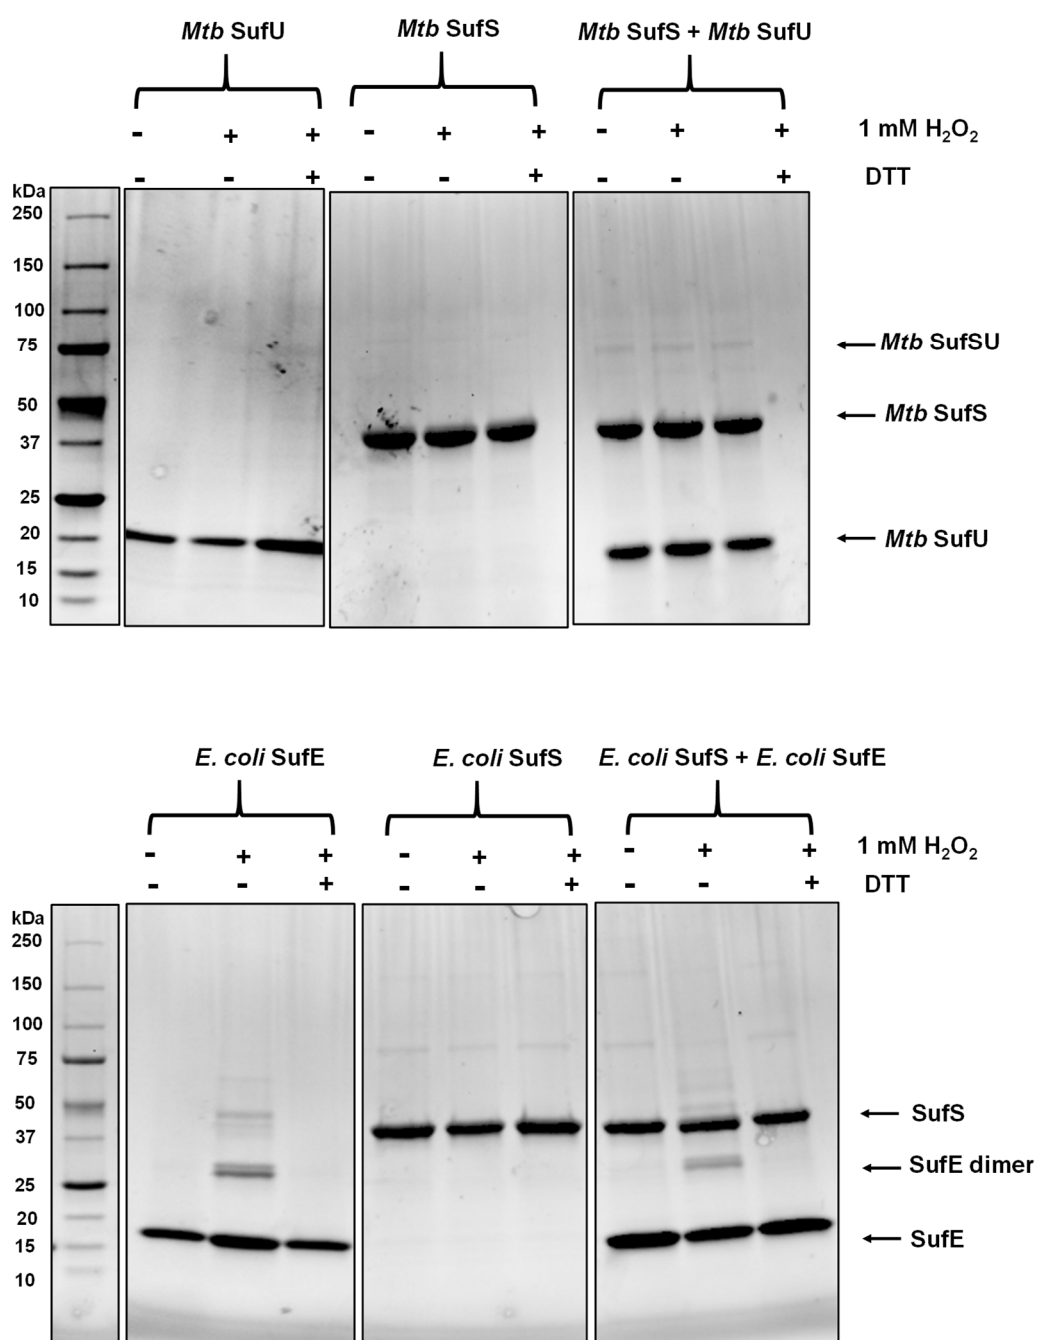

**Table S1.** X-Ray data and refinement statistics.

| <b>Data collection statistics</b> (from the XDS CORRECT file) |                                    |
|---------------------------------------------------------------|------------------------------------|
| Beamline                                                      | ESRF-ID30B                         |
| Wavelength (Å)                                                | 0.9763                             |
| Temperature (K)                                               | 100                                |
| Space group                                                   | <i>P1</i>                          |
| <i>a</i> , <i>b</i> , <i>c</i> (Å)                            | 62.3, 75.6, 75.6                   |
| $\alpha$ , $\beta$ , $\gamma$ (°)                             | 92.4, 109.6, 99.7                  |
| Mosaicity (°)                                                 | 0.166                              |
| Resolution range (Å)                                          | 50-1.65 (1.75-1.65) <sup>§</sup>   |
| Total No of reflections                                       | 422116 (64985) <sup>§</sup>        |
| No of unique reflections                                      | <b>147275</b> (22934) <sup>§</sup> |
| Wilson B factor (Å <sup>2</sup> )                             | 29.1                               |
| Completeness (%)                                              | 95.7 (92.4) <sup>§</sup>           |
| Multiplicity                                                  | 2.9 (2.8) <sup>§</sup>             |
| Mean I/ $\sigma$ (I)                                          | 7.47 (0.96) <sup>§</sup>           |
| <i>R</i> <sub>meas</sub> (%)                                  | <b>10.4 (117.6)<sup>§</sup></b>    |
| CC1/2 (%)                                                     | 99.6 (54.1) <sup>§</sup>           |
| <b>Refinement statistics</b> (from the final refmac log file) |                                    |
| PDB code of the final refined model                           | <b>8ODQ</b>                        |
| PDB code for initial Molecular                                | 5XT5                               |
| No of molecules SufU-SufS in A.U                              | 2                                  |
| No. of atoms refined                                          | <b>9784</b>                        |
| Resolution range (Å)                                          | 48.7-1.65Å                         |
| No of reflections use for refinement                          | 140036                             |
| Refinement Rwork/Rfree (%)                                    | 17.9/21.4                          |
| Mean B value (Å <sup>2</sup> )                                | <b>27.0</b>                        |
| RMSD bond length (Å)                                          | 0.01                               |
| RMSD bond angle (°)                                           | <b>2.1</b>                         |

§ : in parenthesis, values of high resolution shell

**Table S2.** Contact interactions (amino-acid involved).

|                         | SufU            | SufS            | Distance (Å) |         |
|-------------------------|-----------------|-----------------|--------------|---------|
| A. Hydrogen bonds       | C:SER 68 [OG]   | D:ASP 355 [OD1] | 2.87         |         |
|                         | C:ARG 128 [NH2] | D:ASP 355 [OD1] | 3.12         |         |
|                         | C:TYR 9 [OH]    | D:ASP 355 [OD1] | 2.59         |         |
|                         | C:SER 68 [N]    | D:ASP 355 [OD2] | 2.94         |         |
|                         | C:ARG 128 [NH1] | D:GLN 358 [OE1] | 2.98         |         |
|                         | C:CYS 40 [S2]   | D:VAL 369 [O]   | 3.29         |         |
|                         | C:CYS 40 [S2]   | D:HIS 371 [N]   | 3.11         |         |
|                         | C:CYS 40 [S2]   | D:ARG 368 [NE]  | 2.84         |         |
|                         | C:CYS 40 [O]    | D:HIS 354 [NE2] | 2.83         |         |
|                         | C:GLY 41 [O]    | D:HIS 352 [NE2] | 2.59         |         |
| B. Salt Bridges         | C:ARG 128 [NH2] | D:ASP 355 [OD1] | 3.12         |         |
|                         | C:ARG 128 [NH1] | D:ASP 355 [OD1] | 3.92         |         |
|                         | C:GLU 6 [OE2]   | D:ARG 409 [NH1] | 3.53         |         |
|                         | C:ASP 42 [OD1]  | D:HIS 352 [NE2] | 3.33         |         |
|                         | C:ASP 42 [OD1]  | D:HIS 354 [ND1] | 3.33         |         |
|                         | C:ASP 42 [OD2]  | D:HIS 354 [ND1] | 3.19         |         |
|                         | SufU            | SufS            |              |         |
|                         | Residues        | BSA(Å²)         | Residues     | BSA(Å²) |
| C. Interfacing residues | C:ARG 4         | 57.72           | D:ARG 25     | 76.45   |
|                         | C:LEU 5         | 59.63           | D:GLY 26     | 17.27   |
|                         | C:GLU 6         | 62.27           | D:GLY 350    | 10.91   |
|                         | C:ILE 8         | 5.69            | D:VAL 351    | 1.18    |
|                         | C:LEU 14        | 35.98           | D:VAL 359    | 12.38   |
|                         | C:TYR 17        | 39.12           | D:ASP 362    | 44.81   |
|                         | C:LYS 18        | 44.87           | D:ARG 368    | 15.94   |
|                         | C:ILE 39        | 28.72           | D:GLY 370    | 15.31   |
|                         | C:ASP 42        | 7.20            | D:ALA 384    | 44.38   |
|                         | C:GLN 65        | 34.10           | D:ALA 385    | 4.18    |
|                         | C:GLY 66        | 9.66            | D:ARG 409    | 37.55   |
|                         | C:CYS 67        | 34.94           | D:PHE 413    | 96.72   |
|                         | C:LYS 124       | 27.41           | D:PHE 414    | 71.20   |
|                         | C:TYR 125       | 52.87           | D:GLY 415    | 1.57    |
|                         | C:PRO 126       | 4.36            | D:ARG 416    | 21.40   |
|                         | C:CYS 131       | 2.17            |              |         |

**Table S2** : PISA calculation [1] performed on the complex *Mtb* SufS-SufU (subunit C and subunit D, Figure S5). **A.** Hydrogen bonds listed with a cut-off of 3.3 Å. **B.** Salt bridges listed with a cut-off of 4 Å. **C.** Other interfacing residues between SufU and SufS that do not form hydrogen bonds or salt bridges. **BSA** is the residue Buried Surface Area upon SufS-SufU complex formation.

## References:

1. Krissinel, E.; Henrick, K. Inference of macromolecular assemblies from crystalline state. *J. Mol. Biol.* **2007**, *372* (3), 774-97.
